## More than medications: A patient-centered assessment of Parkinson's disease care needs during hospitalization

Jessica Shurer, MSW, LCSW,<sup>1</sup> Shannon L. S. Golden, MA,<sup>2</sup> Paul Mihas, MA,<sup>3</sup> Nina Browner, MD<sup>4</sup>

<sup>1</sup>CurePSP, Inc., New York, NY

<sup>2</sup>Goldsmith Research Group, Winston-Salem, NC

<sup>3</sup>Odum Institute for Research in Social Science, University of North Carolina at Chapel Hill

<sup>4</sup>Department of Neurology, University of North Carolina at Chapel Hill

Corresponding author: Nina Browner, MD [browner@neurology.unc.edu](mailto:browner@neurology.unc.edu)

## **Abstract**

**Background** Parkinson's disease (PD) increases the risk of hospitalization and complications while in the hospital. Patient-centered care emphasizes active participation of patients in decision-making and has been found to improve satisfaction with care. Engaging in discussion and capturing hospitalization experience of a person with PD (PwP) and their family care partner (CP) is a critical step towards the development of quality improvement initiatives tailored to the unique hospitalization needs of PD population.

**Objectives** This qualitative study aimed to identify the challenges and opportunities for PD patient-centered care in hospital setting.

**Methods** Focus groups were held with PwPs and CPs to capture first-hand perspectives and generate consensus themes on PD care during hospitalization. A semi-structured guide for focus group discussions included questions about inpatient experiences and interactions with the health system and clinical team. Data was analyzed using inductive thematic analysis.

**Results** A total of twelve PwPs and thirteen CPs participated in seven focus groups. Participants were 52% female and 28% nonwhite; 84% discussed unplanned hospitalizations. This paper focuses on two specific categories that emerged from the data analysis. The first category explores the impact of PD diagnosis on the hospital experience, specifically during planned and unplanned hospitalizations. The second category delves into the unique needs of PwPs and CPs during hospitalization, which included the importance of proper PD medication management, the need for improved hospital ambulation protocols, and the creation of disability informed hospital environment specific for PD.

**Conclusion** PD diagnosis impacts the care experience, regardless of the reason for hospitalization. While provision of PD medications was a challenge during hospitalization, participants also desired flexibility of ambulation protocols and an environment that accommodated their disability. Findings highlight the importance of integrating the perspectives of PwPs and CPs when targeting patient-centered interventions to improve hospital experiences and outcomes.

**Keywords:** Parkinson’s disease; Hospitalization; Patient-centered care; qualitative methods; focus groups

Abstract: 297 words

Total: 4370 words

References: 80

Tables: 4

Appendix 1

**Acknowledgement:** We extend our deepest appreciation to each and every study participant. Their altruistic contribution and willingness to share their experiences has not only enriched our lives, but also have been invaluable in advancing our understanding of PD care during hospitalization and ultimately enhancing the lives of the entire Parkinson disease community.

1           People with a clinical diagnosis of Parkinson’s disease (PD) experience more frequent  
2   and prolonged hospitalizations than their age-matched peers.<sup>1–6</sup> Most hospitalizations occur on  
3   general wards and result from a comorbid disorder or health crisis such as respiratory and urinary  
4   tract infections, cardiovascular diseases, falls and fractures.<sup>7–12</sup> It is well documented that during  
5   hospitalizations, person with PD (PwP) is at a higher risk of complications, including falls,  
6   medication errors, development of delirium and psychosis, and overall decline of their pre-  
7   existing motor and non-motor symptoms of PD.<sup>8,13–16</sup> Improved medication adherence during  
8   hospital stays, e-alerts to PD specialists upon admission, development of the Parkinson’s  
9   Foundation Aware in Care hospital kit, and recommendations for ward certification programs are  
10   among the calls to action and quality improvement interventions that have targeted hospital  
11   outcomes for PD.<sup>17–22</sup> However, to date, only a few have resulted in significant decreases in the  
12   length of stay or complications during hospitalization for PD.<sup>18,23</sup>

13           In the context of inpatient hospitalization for older adults and those with chronic and  
14   serious medical conditions, patient-centered care (PCC) has revealed benefits in intermediate and  
15   distal outcomes, and almost all studies found positive relationships between PCC approaches and  
16   patient satisfaction.<sup>24–27</sup> PCC places patients at the center of the healthcare decision-making  
17   process and recognizes the importance of their individual preferences and goals.<sup>28,29</sup> Growing  
18   awareness of PCC delivery resulted in the establishment of specialized multidisciplinary teams  
19   as the gold standard of outpatient care for PD as well as the increasing application of palliative  
20   care, a traditionally team-based model of care, for the management of the physical, emotional,  
21   and spiritual needs of PwPs.<sup>30–36</sup>

22           Presently, the voices of PwPs and their care partners (CPs) regarding their experiences  
23   during hospitalization are not well represented in the literature, and most research on PCC for PD

24 has focused on outpatient care. Studies that qualitatively investigated hospitalization for PD  
25 primarily highlighted medication mismanagement, struggles with postoperative confusion, and  
26 deterioration of motor symptoms; however, they minimally captured patient-reported needs or  
27 experiences of CPs during hospitalization.<sup>37-41</sup> To bridge this gap and to expand the scope of  
28 patient-centered PD care from outpatient to inpatient settings, our study gathered and analyzed  
29 valuable self-reported experiences of PwPs and CPs regarding hospitalization.

## 30 **Methods**

### 31 *Study design*

32 Focus groups were selected as the optimal methodology to capture first-hand experiences  
33 of PwPs and CPs and to generate themes on PD care during hospitalization.<sup>42,43</sup> Participants  
34 either had a neurologist-confirmed clinical diagnosis of PD or were a family member of a person  
35 with a neurologist-confirmed clinical diagnosis of PD and were able to participate in the  
36 interview. Hospitalization was defined as a planned (e.g., scheduled surgery or procedure) or  
37 unplanned (e.g., emergent or urgent admission) hospital stay for at least 24 hours between  
38 January 2018 and July 2022. Patients hospitalized for deep brain stimulation surgery were  
39 excluded. All participants had to be at least 18 years of age, with no upper age limit.

40 This study was conducted in accordance with the Declaration of Helsinki and was  
41 approved and overseen by the University of North Carolina at Chapel Hill Institutional Review  
42 Board. Participants provided verbal informed consent prior to any study activity, including data  
43 collection. This study was supported by a Parkinson's Foundation Community Outreach  
44 Resource Education grant.

### 45 *Data Collection*

46 Participants were recruited through clinician referrals, announcements shared with North  
47 Carolina-based PD support groups, and flyers placed at the outpatient neurology clinic at the  
48 University of North Carolina at Chapel Hill. A purposive sampling strategy was used to recruit a  
49 variety of PwPs and CPs with a range of hospital experiences (Table 1). Quotas were applied to  
50 the patient sample to ensure a diverse representation, including demographic (e.g., sex, age, race)  
51 and clinical characteristics (e.g., stage of condition as defined by Hoehn and Yahr score, planned  
52 versus unplanned hospitalization experiences).<sup>44</sup> Half-way through recruitment, additional  
53 efforts were made to enroll participants from underrepresented demographics of the study.

54 A semi-structured discussion guide, developed de novo by the research team based on a  
55 review of the published literature on hospitalizations in PD, was used to structure the focus  
56 groups (Appendix 1). As the data collection progressed, the discussion guide was adapted to  
57 incorporate new issues raised by the participants. The questions focusing on aspects of hospital  
58 admission, inpatient experiences, discharge processes, interactions with the health system and  
59 team, and lived experiences of PwPs and CPs thought to be most relevant to patient- and family-  
60 centered outcomes. An experienced group moderator (J.S.) used probing questions to further  
61 expand the discussion. Prior to the focus groups, all the participants completed a brief  
62 questionnaire to capture their demographic information.

63 All focus groups were conducted virtually on the Zoom platform and were recorded and  
64 transcribed verbatim. Each group was 120 minutes in length. Identifiers were stripped from the  
65 transcripts, which were reviewed for accuracy. Participants received \$20 honoraria. After  
66 conducting 7 focus groups, the research team determined that information power was achieved,  
67 and recruitment ended.<sup>42</sup>

68 ***Data management and analysis***

69 Transcripts were independently reviewed by a multidisciplinary team of three  
70 researchers, including a movement disorders specialist (N.B.), a clinical social worker (J.S.), and  
71 a qualitative methods expert (S.G.), to identify emerging concepts related to hospital  
72 experiences. During the first phase of analysis, two investigators (N.B. and S.G.) independently  
73 read 3 transcripts before convening to define initial topics/concepts and develop a preliminary  
74 codebook. Coded data and transcripts were maintained in an electronic database, MAXQDA  
75 2020 (VERBI software, 2019). An inductive thematic approach was used for analysis. The  
76 respective coded transcripts were compared during face-to-face meetings (N.B. and S.G.) to  
77 assess similarities and discrepancies regarding code names and code application. Based on these  
78 consensus meetings, researchers developed a final codebook that was systematically applied to  
79 the remaining transcripts. The team continued to review and code transcripts independently,  
80 meeting regularly to collaboratively discuss coding decisions and to resolve any coding  
81 differences through consensus. All coded transcripts were then reviewed by a third researcher  
82 (J.S.) to ensure consistency.<sup>43</sup> The varied perspectives of team members yielded a nuanced and  
83 robust interpretation of the results and all discrepancies among analysts were resolved. The  
84 research team (N.B., J.S., P.M.) analyzed each code and assessed conceptual relationships among  
85 them to develop higher-level categories and the relevant sub-themes within each category. The  
86 findings were then condensed, and conclusions drawn.

## 87 **Results**

### 88 *Participants*

89 Seven focus groups were conducted. Participants included 12 PwPs (69% in the 65-74  
90 age range and 28% non-white) and 13 CPs, including five PwP-CP dyads, for a total of 25  
91 participants (Table 1). 84% of participants had unplanned hospitalizations and 64% of

92 participants had lived with the PD diagnosis between 6 and 14 years at the time of  
93 hospitalization. All CPs reported unplanned hospitalizations of their loved one with PD. Ten  
94 participants were hospitalized at academic medical centers. During recruitment, participants were  
95 identified by their roles in the healthcare system (patient versus family CP). Initially, the  
96 researches planned to create homogenic focus groups that thought would facilitate open  
97 discussion.<sup>45</sup> However, during the recruitment, several PwPs in more advanced diseases stages  
98 expressed a preference for their CPs to be present during focus group and help navigate  
99 challenges with speech or slower speed of processing, which made it difficult for them to fully  
100 participate in the discussion. In these PwP – CP dyads, the CP commonly participated in  
101 discussion by either voicing their own opinion about hospitalization or helping the PwP express  
102 their thoughts, thus playing the role of “patient’s voice.” The study included two focus groups  
103 consisting solely of CPs, one focus group with only PwPs, and the remaining four focus groups  
104 had a mix of participants (Table 2).

### 105 **Resulting categories**

106 The focus group discussions revealed rich descriptive and thematic data, however, this paper  
107 focuses on two specific categories: the impact of the PD diagnosis on the patient and family’s  
108 hospital experiences and perceptions of care, and the emergence of distinctive needs of PwPs and  
109 CPs during hospitalization.

110 Tables 3 and 4 present the themes accompanied by the focus group participants' representative  
111 quotes. Each quote is marked with participant number (P#), focus group number (G#), and  
112 whether the participant identified as PwP or CP. In the following section, we outline the major  
113 themes of each category.



114 **1. Pre – existing PD diagnosis affected participants’ hospital experience and**  
115 **perception of care: “They acknowledged [PD] immediately... that was great!”**  
116 **1.1. Acknowledgment of PD diagnosis by the health care team was important to**  
117 **participants.**

118 Although none of the participants’ hospitalizations was directly related to PD symptoms,  
119 the presence of a PD diagnosis and whether the health care team (HCT) actively acknowledged  
120 the PD diagnosis had a significant impact on the perceptions of care of both for the PwPs and  
121 CPs. In both planned and unplanned hospitalizations, trust in the HCT was immediately gained  
122 when the team openly acknowledged the patient's diagnosis of PD and demonstrated knowledge  
123 about specific considerations during hospital stays, anesthesia, and post-hospitalization  
124 rehabilitation.

125 **1.2. Hospitalization experience differed according to whether hospitalizations were**  
126 **planned or unplanned.**

127 Overall, the participants’ experiences with planned hospitalization were positive starting  
128 from the ability to choose their HCT with previous experience in PD care.

129 *“That was really important to me. I wanted to make sure that there was somebody that*  
130 *could do a good job with hip replacement but they've had patients that had Parkinson's,*  
131 *so they knew that that was an element that was different.” (P15G4PwP)*

132 PwP chose the date of their planned hospitalization to ensure the presence of CP during  
133 the hospital stay and after the discharge: *“And so I actually chose that particular surgery time so*  
134 *that I knew my daughter would be around... It was at Christmas time and... She is a teacher, and*  
135 *she was actually off for the next two and a half weeks.” (P5G1PwP)*

136 During planned hospitalizations, PwPs had support from the rehabilitation services, and  
137 were given precise discharge instructions regarding the primary cause of hospitalization. Still,  
138 participants admitted to struggling to maintain the timing of their PD medication dosage during  
139 the hospital stay and their discharge instructions did not reference their diagnosis of PD.

140 In contrast, unplanned hospitalizations were described as “*chaotic*,” requiring quick  
141 decision-making from either PwPs or CPs on whether an ER visit was warranted. For those with  
142 unplanned hospitalizations, not one participant mentioned that they had a plan for contacting  
143 their neurologist or primary care physician. PwPs and CPs from multiple focus groups  
144 commented on delayed access to PD medications in the ER as well as perceived challenges with  
145 care delivery (e.g., HCT ability to perform intravenous cannulation placement or chest X-ray)  
146 due to prominent PD symptoms such as tremor. CPs were active participants in the decision to  
147 go to the hospital for unplanned hospitalizations, and in some cases, drove PwP to the ER. At the  
148 ER and once admitted, CP played an essential role in describing the usual state of health of the  
149 PwP and helped communicate any changes in their symptoms from baseline to the HCT.

150 **2. The presence of PD-specific care needs posed an additional challenge for**  
151 **participants during hospitalization: “I expect them to be aware of the fact that I'm**  
152 **different.”**

153 Specific needs affecting the experience from admission to discharge were identified,  
154 including knowledge of PD medications, proper medication management, improved hospital  
155 ambulation protocols, and preservation of independence in the hospital environment.

156 **2.1 Numerous hurdles with PD medications management lead to dissatisfaction with**  
157 **hospital care among the participants**

158 Prior to any type of hospitalization, across all focus groups, PwPs and CPs were  
159 concerned about the availability of PD medications and, as a result, packed and brought their  
160 medications to the hospital. All participants reported issues with consistent and timely delivery  
161 of PD medications at all stages of hospitalization, from admission to discharge. For some,  
162 medications were substituted or re-arranged without explanation, which created mistrust towards  
163 HCT.

164 *“They were giving me different looking medications that they assured me was the same*  
165 *thing, just a different manufacturer or whatever it was. Every time they gave me*  
166 *something and I looked at it and questioned it. ... it was very disconcerting for me.”*  
167 *(P22G6PwP)*

168 Most participants reported needing to have continuous discussions about their medication  
169 regimens with their care team. Trust in the HCT further eroded when the PwP perceived that the  
170 team lacked knowledge of commonly used medications for PD.

171 *“Everyone had a general understanding of Parkinson's, but not what I would consider,*  
172 *really, decent depth. And especially when it came to the medication, that was a tangible*  
173 *way of judging [the team]- that was something that had to happen and they needed to*  
174 *understand why it was important.” (P26G7PwP)*

175 To ensure the correct medications were taken on time and as prescribed, many PwPs and  
176 CPs chose to administer their own medications during hospitalization. This was accomplished  
177 with or without nursing staff awareness. One CP explained: *“I didn't trust them to give it to him,*  
178 *so I wanted to give him his pills.” (P24G7CP)* While acknowledging possible limitations, many  
179 participants expressed a desire to see protocols around medication self-administration in the  
180 hospital. As one participant shared: *“I wish there was a way for patients who are self-aware to*

181 *be able to be more self-dosing while they're in the hospital, with some limit per day. They often*  
182 *know their needs better than any staff can.” (P16G4PwP)*

183 **2.2 The restrictive nature of the hospital fall prevention protocols, along with dissuasion of**  
184 **ambulation, was discordant to participants needs to maintain mobility in the hospital.**

185 Participants who experienced planned hospitalizations for orthopedic issues received  
186 prompt postoperative physical therapy (PT) with encouragement for daily ambulation. However,  
187 during unplanned hospitalizations, PwPs struggled to advocate for their ambulation needs and  
188 reported limited or no evaluation by PT and decreased mobility due to bed confinement. While  
189 CPs were commonly present at the bedsides of PwP, they were unsuccessful in advocating for  
190 more physical activity. In all focus groups, both PwPs and CPs remarked that the immobility of  
191 the PwP was not a concern for HCT. While some participants actively advocated for more  
192 physical activity and an assessment by a PT during their hospital stay, others did not, but still  
193 expressed their concerns during their focus group.

194 There were multiple PwPs with good postural stability and no history of falls who were  
195 deemed to be a “fall risk” during their hospitalization. *“It was kind of funny that as soon as I said*  
196 *‘Parkinson's’ they put a tag on my hand saying that I have fall risk. So, after that, they wouldn't*  
197 *let me get off the bed by myself, even though I was able to walk.” (P16G4PwP)* The discrepancy  
198 between PwP needs to maintain mobility in the hospital, and the restrictive nature of the hospital  
199 fall prevention protocol, along with dissuasion of ambulation, was unsettling to the patients.  
200 *“They had me in lockdown mode because I was in the fall risk... I would just attempt to escape*  
201 *from Alcatraz.” (P25G7PwP)* While participants acknowledged fall prevention as an important  
202 aspect of hospitalization, not many PwPs mentioned success in their advocacy to the HCT to

203 revert fall prevention protocols despite obvious distress that such protocols created during their  
204 hospital stay.

205 **2.3 Hospital environment was not accommodating towards participants' existing motor**  
206 **and non – motor limitations, indicating the need for disability-informed hospital**  
207 **environment.**

208 Both CP and PwP participants reported feeling that PwP's sense of was significantly  
209 altered in the hospital. They described the impact of poor fine motor control (due to bradykinesia  
210 or tremor) on PwP's ability to attend to daily tasks, such as eating and preferring finger foods on  
211 the menu, drinking from half-filled glasses to prevent spillage, and requiring assistance with  
212 managing urinals or pushing buttons on bed controls. Both PwPs and HCT preferred CPs to be at  
213 the bedside to aid in communication related to PD (e.g., voice, cognition), although many CPs  
214 commented on the lack of accommodations for them, including limited space at the bedside or  
215 uncomfortable chairs. Some participants described significantly interrupted night sleep due to  
216 vital sign assessments, hearing conversations at the nursing station, or being awakened early to  
217 take morning medications. Some CPs observed that sleep interruptions created subsequent  
218 confusion and delirium and negatively affected the hospital experience for PwPs.  
219 Notwithstanding the reason for hospitalization, when accommodations for PD-specific care  
220 needs were included in hospital care, the experience was perceived by PwPs and CPs as more  
221 positive than when accommodations were excluded.

222 **Discussion**

223 Our study used an innovative approach to define care needs of PwPs and CPs in the  
224 inpatient setting. By gathering first-hand experiences from direct stakeholders, we used  
225 qualitative and patient-centered methods to define the challenges and opportunities for

226 improving hospitalization for PD. Thematic analysis revealed unique needs of PwPs and CPs  
227 while in the hospital, including the desire for individualized treatment plans and approaches, and  
228 the impact of the PD diagnosis on the perception of care during hospitalization.

229 Consistent with previous literature, the timely provision of PD medications was a key  
230 factor in the experience of and satisfaction with care for participants.<sup>37,46,47</sup> In a systematic  
231 review examining the prevalence of adverse events related to medication errors, 31% of PwPs  
232 expressed dissatisfaction in the way their PD was managed.<sup>47</sup> A more recent study focusing on  
233 motor outcomes identified medication errors as the most important factor in motor deterioration  
234 during hospitalization.<sup>14</sup> Owing to challenges with medications in the hospital, most participants  
235 in our study proceeded with or desired medication self-management. Studies in other patient  
236 populations demonstrated the benefits of carefully applying validated medication self-  
237 administration protocols during hospitalization and after discharge.<sup>48-50</sup> The potential benefits  
238 and barriers to PD medication self-administration have been explored in outpatient settings;  
239 however, no study to date has assessed attitudes toward inpatient medication self-management in  
240 the PD population.<sup>51,52</sup> Strategic and evidence-based medication self-management protocols for  
241 PwPs in the early stages or with support of CPs could empower PwPs and CPs and alleviate the  
242 workload on hospital staff.

243 Participants highlighted an important opportunity to improve PCC through individualized  
244 assessment of fall risk and flexibility in fall prevention protocols. To our knowledge, the study of  
245 falls and fall prevention protocols in hospitalized PwPs does not exist, even though gait and  
246 balance deficits were found in 41% of hospitalized PD patients, and prospective studies  
247 documented falls in up to 70% of PwPs.<sup>53,54</sup> In older adults, a multidisciplinary and patient-  
248 centered approach to the development and implementation of hospital fall prevention protocols

249 has been beneficial and could serve as a roadmap for similar quality improvement initiatives for  
250 PwPs.<sup>55-57</sup> Participants in our study also strongly advocated for safe mobilization and early  
251 assessment by rehabilitation therapists during their hospital stay because of their fear or the  
252 reality of worsening PD motor symptoms due to immobility. Although there is a lack of literature  
253 on the safety and feasibility of early mobilization for hospitalized PwPs on general wards,  
254 studies show the benefits of early mobilization after surgery in PD.<sup>58,59</sup> Walking during  
255 hospitalization is effective for older adults, promoting mobility, shortening hospital stays, and  
256 increasing likelihood of discharge to home.<sup>60</sup> Interventions to encourage mobility in this  
257 population show promise in preventing hospital-associated functional decline and maintaining  
258 prehospitalization mobility.<sup>61-63</sup> Reported barriers to physical activity during hospitalization  
259 include insufficient staffing to assist with or encourage mobility, illness symptoms, fear of falls,  
260 and a discouraging hospital environment. Our study participants alluded to similar barriers to  
261 mobilization during their hospital stays.<sup>64-66</sup> In addition to further research on fall prevention  
262 protocols for hospitalized PwPs, identifying patients with low fall risk and encouraging safe  
263 ambulation could be the first step to translate the well-established benefits of sustained mobility  
264 from outpatient to inpatient care for PD and to empower PwPs and CPs during hospitalization.<sup>67</sup>

265 In our study, nearly two-thirds of participants lived with the PD diagnosis for more than 6  
266 years, and 84% experienced unplanned hospitalizations, emphasizing the complexity of care in  
267 the mid- and later stages of PD. The participants' descriptions of challenges with navigating the  
268 hospital environment, including but not limited to tremor preventing the ease of intravenous  
269 cannulation placement, difficulty picking up and swallowing food that was served, and using  
270 hospital equipment like nurse call buttons, were not anticipated by the researchers when this  
271 study was designed. These PD-related challenges point to the hidden impact of hospitalization on

272 one's sense of independence. In addition, many CPs mentioned worsening of cognitive function  
273 or the development of delirium in PwPs while hospitalized. Our study methods precluded us  
274 from identifying specific practices implemented for delirium prevention; however, participants in  
275 multiple focus groups mentioned poor sleep protection for PwP during hospitalization. This was  
276 similar for CPs, who left the hospital feeling exhausted from reportedly sitting in uncomfortable  
277 chairs, monitoring and speaking for their PwP, and continuing to care for their partners once  
278 discharged home. Patients diagnosed with PD are fivefold more likely to be treated for delirium  
279 than patients from the general population, which may be related to non-motor symptoms in PD,  
280 such as dementia, cognitive impairment, and sleep disturbances.<sup>8,68,69</sup> Since hospitalization  
281 places older adults and PwPs alike at risk for new or worsening disability and reduces likelihood  
282 of recovery, several successful interventions have been employed to modify hospital  
283 environment and improve patient experience and outcomes.<sup>57,61,62,70</sup> The hospital environment has  
284 a significant impact on patient satisfaction with care, and thus, it could be beneficial to develop  
285 and adopt customized hospital accommodations for PwPs to optimize outcomes and decrease  
286 risk of complications.<sup>23,71</sup>

287         When patients with chronic conditions are admitted to the hospital, they are expected to  
288 switch from being the leader of their own care to being a passive consumer who resumes self-  
289 management only upon discharge. Consequently, during hospitalization, the combined stress of  
290 acute and chronic illness, set against the background of ongoing pressure to advocate for their  
291 unique needs, may be all-consuming for PwPs and CPs. Yet, this can be easily overlooked by  
292 HCTs as they are focused on medical management of the acute condition that caused  
293 hospitalization. In our study, PwPs and CPs sought active acknowledgement of PD diagnosis by  
294 their HCT and adjustment of the hospital communications, protocols or even environment, all of



295 which underscore the impact of PD diagnosis on their perceptions of and experiences with  
296 inpatient care. Chronic care advocates argue that hospitals will continue to play a key role in  
297 chronic disease care, despite how many acute hospitalizations can be avoided, as most chronic  
298 conditions are characterized by acute exacerbations requiring admission.<sup>72,73</sup> Innovative care  
299 delivery models, such as the Chronic Care Model, recognize the importance of better preparing  
300 hospitals for a role in chronic illness management and demonstrate positive outcomes associated  
301 with specialized knowledge of PD among inpatient HCTs.<sup>74,75</sup> Thus, key findings from our study  
302 support acknowledging and accommodating the intersectional needs between the chronic  
303 condition of PD and the acute reason for hospitalization of the PwP.

304         The strength of our study is the use of purposeful sampling, a technique widely used in  
305 qualitative research, to identify and select information-rich cases for the most effective use of  
306 limited resources.<sup>42</sup> Purposive sampling allowed us to identify and select individuals in different  
307 stages of PD and ensure that we would capture maximum variation of hospitalization  
308 experiences. Qualitative analysis can reveal themes in the data that otherwise may be difficult to  
309 identify using quantitative approaches. Focus groups, as a qualitative method, carried an  
310 additional strength by creating information – rich data. Focus groups allowed people to discuss  
311 the relevant topics with other PwPs and CPs using their own language, to build upon each  
312 other's accounts and promoted 'memory synergy', bringing forth a 'collective memory' of varied  
313 perspectives on similar experiences during hospitalization.<sup>76</sup> One of the limitations of our study  
314 is that we were unable to recruit CPs who experienced planned hospitalizations with their PwP,  
315 and, as a result, this perspective was not represented in our focus groups. Our sample was largely  
316 white, despite having intentionally expanded our recruitment efforts to include PwPs and CPs  
317 from diverse demographic backgrounds. Racial and ethnic differences in diagnosis, care

318 experiences, and treatment utilization with PD are well known.<sup>77</sup> Therefore, the findings from  
319 this study likely cannot be generalized to the overall PD population and must be further validated  
320 in people with varied racial, ethnic, socioeconomic, and clinical backgrounds. Because the focus  
321 groups occurred months after their hospital stays, participants' reports were subject to recall bias,  
322 and their nonclinical knowledge may have restricted their abilities to identify all factors  
323 impacting their hospitalizations. Despite these limitations, this study provided a novel  
324 opportunity for PwPs and CPs to describe their own realities of their hospitalization experiences.

325 Our study adds to the canon of literature on hospital care for PD. Still, several concepts  
326 brought forth by this study warrant further exploration. There is an opportunity to further  
327 investigate the role and impact of advocacy by PwPs and CPs on healthcare delivery, as well as  
328 explore methodology to capture the real-time experiences of PwPs and CPs during  
329 hospitalization, as has been accomplished in other medical conditions.<sup>78</sup> Additionally, the  
330 methods and findings of this study serve as good starting points for understanding the hospital  
331 experiences of those with atypical parkinsonian syndromes, including progressive supranuclear  
332 palsy and multiple system atrophy, given the complexity of symptoms, rapid disease progression,  
333 profound lack of awareness of these rarer neurodegenerative diagnoses within the medical  
334 community, and the current dearth of research on hospital care for atypical parkinsonism.<sup>79,80</sup>

### 335 **Conclusion**

336 Our qualitative study draws attention to the significant impact a PD diagnosis can have  
337 on planned and unplanned hospital stays, even when the reason for care is not directly related to  
338 PD. It highlights the plethora of unique needs PwPs and their CPs have during hospitalization.  
339 Findings from this study can be used to inform patient-centered interventions aimed at improving  
340 the experience with hospital care for PD, including tools that help PwPs prepare for and advocate

341 during hospitalization as well as ensuring flexibility, as appropriate, within hospital protocols.  
342 Empowering PwPs and CPs to communicate their questions, concerns, goals, and needs, both  
343 generally and regarding PD, with HCT in the hospital setting, thus applying the principles of  
344 PCC, could lead to the care they desire and set them up for higher likelihood of positive  
345 outcomes following hospitalization.

346

347

348

349

350

351

352

353

## Bibliography

1. MJ Aminoff, CW Christine, JH Friedman, et al. Management of the hospitalized patient with Parkinson's disease: Current state of the field and need for guidelines. *Parkinsonism Relat Disord*. 2011;17(3):139-145. doi:10.1016/j.parkreldis.2010.11.009
2. Kowal SL, Dall TM, Chakrabarti R, Storm M V, Jain A. The current and projected economic burden of Parkinson's disease in the United States. *Movement Disorders* . 2013;28(3):311-318. doi:10.1002/mds.25292
3. Chou KL, Zamudio J, Schmidt P, et al. Hospitalization in Parkinson disease: A survey of National Parkinson Foundation Centers. *Parkinsonism Relat Disord*. 2011;17(6):440. doi:10.1016/J.PARKRELDIS.2011.03.002
4. Su CM, Kung C Te, Chen FC, et al. Manifestations and Outcomes of Patients with Parkinson's Disease and Serious Infection in the Emergency Department. *Biomed Res Int*. 2018;2018. doi:10.1155/2018/6014896
5. Hobson DE, Lix LM, Azimae M, Leslie WD, Burchill C, Hobson S. Healthcare utilization in patients with Parkinson's disease: a population-based analysis. *Parkinsonism Relat Disord*. 2012;18(8):930-935. doi:10.1016/J.PARKRELDIS.2012.04.026
6. Shahgholi L, De Jesus S, Wu SS, et al. Hospitalization and rehospitalization in Parkinson disease patients: Data from the National Parkinson Foundation Centers of Excellence. *PLoS One*. 2017;12(7):1-10. doi:10.1371/journal.pone.0180425
7. Braga M, Pederzoli M, Antonini A, Beretta F, Crespi V. Reasons for hospitalization in Parkinson's disease: A case-control study. *Parkinsonism Relat Disord*. 2014;20(5):488-492. doi:10.1016/J.PARKRELDIS.2014.01.022
8. Lubomski M, Rushworth RL, Tisch S. Hospitalisation and comorbidities in Parkinson's disease: a large Australian retrospective study. *J Neurol Neurosurg Psychiatry*. 2015;86:324-330. doi:10.1136/jnnp-2014-307822
9. Woodford H, Walker R. Emergency hospital admissions in idiopathic Parkinson's disease. *Mov Disord*. 2005;20(9):1104-1108. doi:10.1002/mds.20485
10. Gil-Prieto R, Pascual-Garcia R, San-Roman-Montero J, Martinez-Martin P, Castrodeza-Sanz J, Gil-De-Miguel A. Measuring the burden of hospitalization in patients with Parkinson's disease in Spain. *PLoS One*. 2016;11(3). doi:10.1371/journal.pone.0151563
11. Okunoye O, Kojima G, Marston L, Walters K, Schrag A. Factors associated with hospitalisation among people with Parkinson's disease-A systematic review and meta-analysis. Published online 2020. doi:10.1016/j.parkreldis.2020.02.018
12. Réa-Neto Á, Dal Vesco BC, Bernardelli RS, Kametani AM, Oliveira MC, Teive HAG. Evaluation of Patients with Parkinson's Disease in Intensive Care Units: A Cohort Study. *Parkinsons Dis*. 2021;2021:2948323. doi:10.1155/2021/2948323
13. CP Derry, KJ Shah, L Caie, CE Counsell. Medication management in people with Parkinson's disease during surgical admissions. *Postgrad Med J*. 2010;86(1016):334-337. doi:10.1136/pgmj.2009.080432
14. Gerlach OHH, Broen MPG, Weber WEJ. Motor outcomes during hospitalization in Parkinson's disease patients: A prospective study. *Parkinsonism Relat Disord*. 2013;19(8):737-741. doi:10.1016/J.PARKRELDIS.2013.04.017
15. Magnuszewski L, Wojszel A, Kasiukiewicz A, Wojszel ZB. Falls at the Geriatric Hospital Ward in the Context of Risk Factors of Falling Detected in a Comprehensive Geriatric Assessment. *Int J Environ Res Public Health*. 2022;19(17):10789. doi:10.3390/ijerph191710789

16. Skelly R, Brown L, Fogarty A. Delayed administration of dopaminergic drugs is not associated with prolonged length of stay of hospitalized patients with Parkinson's disease. *Parkinsonism Relat Disord*. 2017;35:25-29. doi:10.1016/J.PARKRELDIS.2016.11.004
17. Hobson P, Roberts S, Davies G. The introduction of a Parkinson's disease email alert system to allow for early specialist team review of inpatients. doi:10.1186/s12913-019-4092-3
18. Azmi H, Coccoziello L, Nyirenda T, et al. Adherence to a strict medication protocol can reduce length of stay in hospitalized patients with Parkinson's Disease. *Clin Park Relat Disord*. 2020;3. doi:10.1016/J.PRDOA.2020.100076
19. Nance MA, Boettcher L, Edinger G, et al. Quality Improvement in Parkinson's Disease: A Successful Program to Enhance Timely Administration of Levodopa in the Hospital. *J Parkinsons Dis*. 2020;10(4):1551-1559. doi:10.3233/JPD-202024
20. Aslam S, Simpson E, Baugh M, Shill H. Clinical Practice. *Neurology*. 2020;10(1):23-28. doi:10.1212/CPJ.0000000000000709
21. Azmi H, Coccoziello L, Harvey R, et al. Development of a Joint Commission Disease-Specific Care Certification Program for Parkinson Disease in an Acute Care Hospital. *Journal of Neuroscience Nursing*. 2019;51(6):313-319. doi:10.1097/JNN.0000000000000472
22. Parkinson Foundation. Hospital Care Kits. Advocate for your best care with the Aware in Care kit. <https://www.parkinson.org/resources-support/hospital-care-kits>.
23. Skelly R, Brown L, Fakis A, et al. Does a specialist unit improve outcomes for hospitalized patients with Parkinson's disease? *Parkinsonism Relat Disord*. 2014;20(11):1242-1247. doi:10.1016/j.parkreldis.2014.09.015
24. Wolf DM, Lehman L, Quinlin R, Zullo T, Hoffman L. Effect of patient-centered care on patient satisfaction and quality of care. *J Nurs Care Qual*. 2008;23(4):316-321. doi:10.1097/01.NCQ.0000336672.02725.A5
25. Counsell SR, Holder CM, Liebenauer LL, et al. Effects of a multicomponent intervention on functional outcomes and process of care in hospitalized older patients: a randomized controlled trial of Acute Care for Elders (ACE) in a community hospital. *J Am Geriatr Soc*. 2000;48(12):1572-1581. doi:10.1111/J.1532-5415.2000.TB03866.X
26. Rathert C, Wyrwich MD, Boren SA. Patient-centered care and outcomes: A systematic review of the literature. *Medical Care Research and Review*. 2013;70(4):351-379. doi:10.1177/1077558712465774
27. Rocco NM, Scher KRC, Basberg BMM, Yalamanchi SM, Baker-Genaw KM. Patient-Centered Plan-of-Care Tool for Improving Clinical Outcomes. *Quality Management in Health Care*. 2011;20(2):89-97.
28. Berwick DM. What "patient-centered" should mean: Confessions of an extremist. *Health Aff*. 2009;28(4). doi:10.1377/HLTHAFF.28.4.W555
29. Institute of Medicine. Crossing the Quality Chasm: A New Health System for the 21st Century. *Crossing the Quality Chasm: A New Health System for the 21st Century*. Published online July 25, 2014:360. Accessed February 12, 2023. <http://europepmc.org/books/NBK222274>
30. Connor KI, Cheng EM, Barry F, et al. Randomized trial of care management to improve Parkinson disease care quality A nurse-led model increases quality of care in Parkinson disease Criteria for rating therapeutic and diagnostic studies. Published online 2019. doi:10.1212/WNL.00000000000007324
31. Eggers C, Dano R, Schill J, Fink G, Hellmich M, Timmermann L. Patient-centered integrated healthcare improves quality of life in Parkinson's disease patients: a randomized controlled trial On behalf of the CPN study group. *J Neurol*. 1234;265:764-773. doi:10.1007/s00415-018-8761-7

32. Rajan R, Brennan L, Bloem BR, et al. Integrated Care in Parkinson's Disease: A Systematic Review and Meta-Analysis. *Movement Disorders*. 2020;35(9):1509-1531. doi:10.1002/mds.28097
33. Bhidayasiri R, Panyakaew P, Trenkwalder C, et al. Delivering patient-centered care in Parkinson's disease: Challenges and consensus from an international panel. *Parkinsonism Relat Disord*. 2020;72:82-87. doi:10.1016/j.parkreldis.2020.02.013
34. Vlaanderen FP, Rompen L, Munneke M, Stoffer M, Bloem BR, Faber MJ. The Voice of the Parkinson Customer. *J Parkinsons Dis*. 2019;9(1):197-201. doi:10.3233/JPD-181431
35. Kluger BM, Miyasaki J, Katz M, et al. Comparison of Integrated Outpatient Palliative Care With Standard Care in Patients With Parkinson Disease and Related Disorders: A Randomized Clinical Trial. *JAMA Neurol*. 2020;77(5):551-560. doi:10.1001/JAMANEUROL.2019.4992
36. Lennaerts-Kats H, Ebenau A, Van Der Steen JT, et al. "No One Can Tell Me How Parkinson's Disease Will Unfold": A Mixed Methods Case Study on Palliative Care for People with Parkinson's Disease and Their Family Caregivers. *J Parkinsons Dis*. 2022;12(1):207-219. doi:10.3233/JPD-212742
37. Barber M, Stewart D, Grosset D, MacPhee G. Patient and carer perception of the management of Parkinson disease after surgery. *Age and Ageing*. 2001;30(2):171-172. <https://www.researchgate.net/publication/11944801>
38. Gerlach OHH, Broen MPG, van Domburg PHMF, Vermeij AJ, Weber WEJ. Deterioration of Parkinson's disease during hospitalization: Survey of 684 patients. *BMC Neurol*. 2012;12(1):1-6. doi:10.1186/1471-2377-12-13/TABLES/2
39. Buetow S, Henshaw J, Bryant L, O'sullivan D. Medication Timing Errors for Parkinson's Disease: Perspectives Held by Caregivers and People with Parkinson's in New Zealand. *Parkinson Disease*. 2009;November:1-6. doi:10.4061/2010/432983
40. Read Id J, Cable S, Lö Fqvist C, Iwarsson S, Bartl G, Schrag A. Experiences of health services and unmet care needs of people with late-stage Parkinson's in England: A qualitative study. Published online 2019. doi:10.1371/journal.pone.0226916
41. Carney Anderson L, Fagerlund K. ORIGINAL RESEARCH: *The Perioperative Experience of Patients with Parkinson's Disease: A Qualitative Study*. Vol 113.; 2013.
42. Patton MQ. *Qualitative Research and Evaluation Methods*. 3rd ed. Sage Publications ; 2002.
43. Busetto L, Wick W, Gumbinger C. How to use and assess qualitative research methods. *Neurol Res Pract*. 2020;2(14):1-10. doi:10.1186/s42466-020-00059-z
44. Goetz CG, Poewe W, Rascol O, et al. Movement Disorder Society Task Force report on the Hoehn and Yahr staging scale: Status and recommendations. *Movement Disorders*. 2004;19(9):1020-1028. doi:10.1002/mds.20213
45. Kaiser K. Protecting Respondent Confidentiality in Qualitative Research. *Qual Health Res*. 2009;19(11):1632-1641. doi:10.1177/1049732309350879
46. Burroughs TE, Waterman AD, Gallagher TH, et al. Patients' Concerns About Medical Errors During Hospitalization. *The Joint Commission Journal on Quality and Patient Safety*. 2007;33(1):5-14. doi:10.1016/S1553-7250(07)33002-X
47. Gerlach OH, Winogrodzka A, Weber WE. Clinical problems in the hospitalized Parkinson's disease patient: systematic review. *Mov Disord*. 2011;26(2):197-208. doi:10.1002/mds.23449
48. Manias E, Beanland CJ, Riley RG, Hutchinson AM. Development and validation of the self-administration of medication tool. *Annals of Pharmacotherapy*. 2006;40(6):1064-1073. doi:10.1345/APH.1G677
49. Vanwesemael T, Dilles T, Van Rompaey B, Boussey K. An Evidence-Based Procedure for Self-Management of Medication in Hospital: Development and Validation of the SelfMED Procedure. *Pharmacy*. 2018;6(3):77. doi:10.3390/pharmacy6030077

50. Vanwesemael T, Boussery K, Manias E, Petrovic M, Fraeyman J, Dilles T. Self-management of medication during hospitalisation: Healthcare providers' and patients' perspectives. . *J Clin Nurs*. 2018;27(3-4):753-768.
51. Tuijt R, Tan A, Armstrong M, et al. Self-Management Components as Experienced by People with Parkinson's Disease and Their Carers: A Systematic Review and Synthesis of the Qualitative Literature. Published online 2020. doi:10.1155/2020/8857385
52. Armstrong M, Tuijt R, Read J, et al. Health care professionals' perspectives on self-management for people with Parkinson's: qualitative findings from a UK study. *BMC Geriatr*. 2021;21(1). doi:10.1186/s12877-021-02678-w
53. Bernhard FP, Sartor J, Bettecken K, et al. Wearables for gait and balance assessment in the neurological ward - study design and first results of a prospective cross-sectional feasibility study with 384 inpatients. *BMC Neurol*. 2018;18(1). doi:10.1186/s12883-018-1111-7
54. Wood BH, Bilclough JA, Bowron A. Incidence and prediction of falls in Parkinson's disease: a prospective multidisciplinary study. *J Neurol Neurosurg Psychiatry*. 2002;72:721-725. doi:10.1136/jnnp.72.6.721
55. Matarese M, Ivziku D, Bartolozzi F, Piredda M, De Marinis MG. Systematic review of fall risk screening tools for older patients in acute hospitals. *J Adv Nurs*. 2015;71(6):1198-1209. doi:10.1111/jan.12542
56. Hempel S, Newberry S, Wang Z, et al. Hospital Fall Prevention: A Systematic Review of Implementation, Components, Adherence, and Effectiveness. *J Am Geriatr Soc*. 2013;61:483-494. doi:10.1111/jgs.12169
57. Covinsky KE, Pierluissi E, Johnston CB. *Hospitalization-Associated Disability "She Was Probably Able to Ambulate, but I'm Not Sure."* Vol 306.; 2011. [www.jama.comhttp://geriatrics.medicine.ucsf.edu/agingpatient/](http://www.jama.comhttp://geriatrics.medicine.ucsf.edu/agingpatient/).
58. Macaulay WM, Geller JAM, Brown ARM, Cote LJM, Kiernan HA. Total Knee Arthroplasty and Parkinson Disease: Enhancing Outcomes and Avoiding Complications. *American Academy of Orthopaedic Surgeon*. 2010;18(11):687-694.
59. Schroeder JE, Hughes A, Sama A, et al. Lumbar spine surgery in patients with Parkinson disease. *Journal of Bone and Joint Surgery - American Volume*. 2015;97(20):1661-1666. doi:10.2106/JBJS.N.01049
60. Hastings SN, Choate AL, Mahanna EP, et al. geriatrics Early Mobility in the Hospital: Lessons Learned from the STRIDE Program. Published online 2018. doi:10.3390/geriatrics3040061
61. Cohen Y, Zisberg A, Chayat Y, et al. Walking for Better Outcomes and Recovery: The Effect of WALK-FOR in Preventing Hospital-Associated Functional Decline Among Older Adults. *The Journals of Gerontology: Series A*. 2019;74(10):1664-1670. doi:10.1093/GERONA/GLZ025
62. Resnick B, Boltz M. Optimizing Function and Physical Activity in Hospitalized Older Adults to Prevent Functional Decline and Falls. *Clin Geriatr Med*. 2019;35(2):237-251. doi:10.1016/J.CGER.2019.01.003
63. Wassar Kirk J, Christine Bodilsen A, Tjørnhøj-Thomsen T, et al. A tailored strategy for designing the Walk-Copenhagen (WALK-Cph) intervention to increase mobility in hospitalised older medical patients: a protocol for the qualitative part of the WALK-Cph project. *BMJ Open*. 2018;8:20272. doi:10.1136/bmjopen-2017-020272
64. Brown CJ, Williams BR, Woodby LL, Davis LL, Allman RM. Barriers to mobility during hospitalization from the perspectives of older patients and their nurses and physicians. *J Hosp Med*. 2007;2(5):305-313. doi:10.1002/JHM.209
65. Koenders N, van Oorsouw R, Seeger JPH, Nijhuis-van der Sanden MWG, van de Glind I, Hoogeboom TJ. "I'm not going to walk, just for the sake of walking...": a qualitative,

- phenomenological study on physical activity during hospital stay. *Disabil Rehabil*. 2020;42(1):78-85. doi:10.1080/09638288.2018.1492636
66. Boltz M, Capezuti E, Shabbat N. Nursing staff perceptions of physical function in hospitalized older adults. *Applied Nursing Research*. 2011;24(4):215-222. doi:10.1016/J.APNR.2010.01.001
67. Ellis TD, Colón-Semenza C, Deangelis TR, et al. Evidence for Early and Regular Physical Therapy and Exercise in Parkinson's Disease. *Semin Neurol*. 2021;41(2):189-205. doi:10.1055/S-0041-1725133/ID/JR200054-30
68. Stavitsky K, Nearing S, Bogdanova Y, Mcnamara P, Cronin-Golomb A. The Impact of Sleep Quality on Cognitive Functioning in Parkinson's Disease. *J Int Neuropsychol Soc*. 2012;18(1):108-117. doi:10.1017/S1355617711001482
69. Figueroa-Ramos MI, Arroyo-Novoa CM, Lee KA, Padilla G, Puntillo KA. Sleep and delirium in ICU patients: A review of mechanisms and manifestations. *Intensive Care Med*. 2009;35(5):781-795. doi:10.1007/s00134-009-1397-4
70. de Foubert M, Cummins H, McCullagh R, Brueton V, Naughton C. Systematic review of interventions targeting fundamental care to reduce hospital-associated decline in older patients. *J Adv Nurs*. 2021;77(12):4661-4678. doi:10.1111/jan.14954
71. Rapport F, Hibbert P, Baysari M, et al. What do patients really want? An in-depth examination of patient experience in four Australian hospitals. *BMC Health Serv Res*. 2019;19(1). doi:10.1186/s12913-019-3881-z
72. Hernandez C, Jansa M, Vidal M, et al. The burden of chronic disorders on hospital admissions prompts the need for new modalities of care: a cross-sectional analysis in a tertiary hospital. *QJM*. 2009;102(3):193-202. doi:10.1093/QJMED/HCN172
73. De Regge M, De Pourcq K, Meijboom B, Trybou J, Mortier E, Eeckloo K. The role of hospitals in bridging the care continuum: A systematic review of coordination of care and follow-up for adults with chronic conditions. *BMC Health Serv Res*. 2017;17(1):1-24. doi:10.1186/S12913-017-2500-0/TABLES/4
74. Siu AL, Spragens LH, Inouye SK, Morrison RS, Leff B. The Ironic Business Case For Chronic Care In The Acute Care Setting. <https://doi.org/10.1377/hlthaff.28.1.113>. 2017;28(1):113-125. doi:10.1377/HLTHAFF.28.1.113
75. Skelly R, Brown L, Fakis A, Walker R. Hospitalization in Parkinson's disease: A survey of UK neurologists, geriatricians and Parkinson's disease nurse specialists. *Parkinsonism Relat Disord*. 2015;21(3):277-281. doi:10.1016/j.parkreldis.2014.12.029
76. George Kamberelis, Greg Dimitriadis. *Focus Groups: From Structured Interviews to Collective Conversations*. (Kamberelis G, Dimitriadis G, eds.). Routledge; 2013.
77. Ben-Joseph A, Marshall CR, Lees AJ, Noyce AJ. Ethnic Variation in the Manifestation of Parkinson's Disease: A Narrative Review. Published online 2020. doi:10.3233/JPD-191763
78. Gualandi R, Masella C, Piredda M, Ercoli M, Tartaglioni D. What does the patient have to say? Valuing the patient experience to improve the patient journey. *BMC Health Serv Res*. 2021;21(1). doi:10.1186/S12913-021-06341-3
79. O'shea N, Lyons S, Higgins S, O'dowd S. Neurological update: the palliative care landscape for atypical parkinsonian syndromes. *J Neurol*. 2023;270:2333-2341. doi:10.1007/s00415-023-11574-9
80. Dayal AM, Jenkins ME, Jog MS, Kimpinski K, Macdonald P, Gofton TE. Palliative Care Discussions in Multiple System Atrophy: A Retrospective Review. *Can J Neurol Sci*. 2017;44:276-282. doi:10.1017/cjn.2016.439





## Appendix 1. Focus group discussion guide.

| Topics                        | Questions                                                                                       | Prompts                                                                                                                      | Probes                                                                                                                                                                                                                |
|-------------------------------|-------------------------------------------------------------------------------------------------|------------------------------------------------------------------------------------------------------------------------------|-----------------------------------------------------------------------------------------------------------------------------------------------------------------------------------------------------------------------|
| <b>Before hospitalization</b> |                                                                                                 |                                                                                                                              |                                                                                                                                                                                                                       |
| Introduction                  | Please introduce yourself                                                                       | How long ago was your hospitalization?                                                                                       |                                                                                                                                                                                                                       |
| Before Hospital               | What made you decide to go to the hospital?                                                     | Was it a planned visit? (e.g., scheduled surgery)<br><br>Was it an unexpected situation? (e.g., change in functioning, fall) | Before coming to the hospital (either for planned or unplanned admission), how did you prepare for the hospitalization?<br><br>Did you call your neurologist and they suggested you go? PCP? Urgent care? Called 911? |
| <b>In the Hospital</b>        |                                                                                                 |                                                                                                                              |                                                                                                                                                                                                                       |
| Patient and team interaction  | What is one thing you feel went well during your experience?                                    | Can you tell me more about that?                                                                                             |                                                                                                                                                                                                                       |
|                               | To what degree do you feel that the medical team met your needs?                                | Can you tell me more about that?                                                                                             |                                                                                                                                                                                                                       |
|                               | How do you feel your diagnosis of Parkinson's disease impacted how you were treated, if at all? | Were you treated differently because of Parkinson's? In what ways?                                                           | Has anybody else had a similar experience?<br><br>Did anybody have a different experience?                                                                                                                            |
|                               | What was your impression of how knowledgeable your treatment team was of Parkinson's disease?   | Do you have an example?                                                                                                      | Has anybody else had a similar experience?<br><br>Did anybody have a different experience?                                                                                                                            |
|                               | To what extent were you involved in medical/care decisions?                                     |                                                                                                                              | Does anybody else have anything different to add?                                                                                                                                                                     |
|                               | To what extent was your family member or care provider involved in medical/care decisions?      | Did medical providers involve both you and your family member/care                                                           |                                                                                                                                                                                                                       |

|                      |                                                                                               |                                                                                                                                                                                                |                                                                                                                                                                                                          |
|----------------------|-----------------------------------------------------------------------------------------------|------------------------------------------------------------------------------------------------------------------------------------------------------------------------------------------------|----------------------------------------------------------------------------------------------------------------------------------------------------------------------------------------------------------|
|                      |                                                                                               | <p>provider in decisions? Please elaborate.</p> <p>Did medical providers communicate differently or the same with you as they did with your family member/care provider? Please elaborate.</p> |                                                                                                                                                                                                          |
| Medications and PD   | While in the hospital, were you given your Parkinson’s medications as prescribed, on time?    | If no, please elaborate.                                                                                                                                                                       | Did you need to advocate for yourself/partner to get your medications on time?                                                                                                                           |
|                      | While in the hospital, were your Parkinson’s medications substituted or adjusted by the team? | If yes, please elaborate.                                                                                                                                                                      | <p>Did you need to advocate for yourself/partner to get your medications on time?</p> <p>Did you need to bring your own medications to use in the hospital?</p> <p>Did you use your own medications?</p> |
| Rehab service and PD | Did you need rehabilitation or PT/OT evaluation while in the hospital?                        | If yes, was it provided? How soon?                                                                                                                                                             | <p>If you are using cane or a walker on regular basis at home, were those provided for you in the hospital?</p> <p>Were you encouraged to ambulate in the hospital?</p>                                  |
| Hospital environment | How did you find your environment in the hospital?                                            | Were you able to attend to your activities (bathroom, grooming,                                                                                                                                | If you needed help, who provided it?                                                                                                                                                                     |

|                                                      |                                                                                                                                                            |                                                                                                                            |  |
|------------------------------------------------------|------------------------------------------------------------------------------------------------------------------------------------------------------------|----------------------------------------------------------------------------------------------------------------------------|--|
|                                                      |                                                                                                                                                            | <p>toileting)? Did you needed help?</p> <p>Do you think any of your PD symptoms were impacted by hospital environment?</p> |  |
| <b>Advocacy and empowerment in the hospital</b>      |                                                                                                                                                            |                                                                                                                            |  |
| Aware in Care kit                                    | Do you have an Aware in Care kit and if so, did you bring it with you?                                                                                     | If yes, how were you able to utilize the contents during the hospitalization?                                              |  |
| Advance care directives                              | Have you had any advance care directive paperwork prior to hospitalization?                                                                                | <p>Have you brought any advance care paperwork in?</p> <p>Who, if anybody, reviewed it?</p>                                |  |
| Advice for future hospitalization/ to other patients | Thinking on your experiences that you shared today, are there ways your hospitalization, in regards to your Parkinson's care, could have been made better? | What advice would you give someone with Parkinson's who needs to be hospitalized?                                          |  |
|                                                      | Anything else that comes to mind that we did not talked about in our discussion?                                                                           | Tell me more about that                                                                                                    |  |

**Table 1 Demographic and clinical characteristics of the participants**

| <b>Demographics</b>                     | <b>Total PwP<br/>(n=13)</b> | <b>Total CPs<br/>(n = 12)</b> | <b>Total<br/>(n=25)</b> |
|-----------------------------------------|-----------------------------|-------------------------------|-------------------------|
| <b>Age n (%)</b>                        |                             |                               |                         |
| Below 55 years old                      | 0                           | 1 (8 %)                       | 1 (4%)                  |
| 55-64 years old                         | 0                           | 1 (8 %)                       | 1 (4%)                  |
| 65-74 years old                         | 9 (69 %)                    | 2 (17 %)                      | 11 (44 %)               |
| 75 -84 years old                        | 3 (23 %)                    | 7 (58 %)                      | 10 (40 %)               |
| Over 85 years old                       | 1 (7 %)                     | 1 (8 %)                       | 2 (8 %)                 |
| <b>Gender n (%)</b>                     |                             |                               |                         |
| male                                    | 9 (69 %)                    | 3 (25 %)                      | 12 (48 %)               |
| female                                  | 4 (31 %)                    | 9 (75 %)                      | 13 (52 %)               |
| <b>Highest level of education n (%)</b> |                             |                               |                         |
| High school                             | 0                           | 0                             | 0                       |
| Some College                            | 3 (23 %)                    | 1 (8 %)                       | 4 (16 %)                |
| Associate degree                        | 4 (31 %)                    | 0                             | 4 (16 %)                |
| Bachelor's degree                       | 1 (8 %)                     | 6 (50 %)                      | 7 (28 %)                |
| Master's degree                         | 2 (15 %)                    | 1 (8 %)                       | 3 (12 %)                |
| PhD                                     | 3 (23 %)                    | 4 (33 %)                      | 7 (28 %)                |
| <b>Race n (%)</b>                       |                             |                               |                         |
| White                                   | 10 (77 %)                   | 8 (67 %)                      | 18 (72 %)               |
| Black/African American                  | 1 (8 %)                     | 1 (8 %)                       | 2 (8 %)                 |
| Asian                                   | 2 (15 %)                    | 2 (17 %)                      | 4 (16 %)                |

|                                        |          |            |           |
|----------------------------------------|----------|------------|-----------|
| Multi-racial                           | 0        | 1 (8%)     | 1 (4%)    |
| <b>Yrs since diagnosis of PD n (%)</b> |          |            |           |
| ≥ 15 yrs                               | 1 (8 %)  | 3 (25 %)   | 4 (16 %)  |
| 11 - 14                                | 5 (38 %) | 4 (33 %)   | 9 (36 %)  |
| 6 – 10                                 | 4 (31 %) | 3 (25 %)   | 7 (28 %)  |
| 3 – 5                                  | 3 (23 %) | 2 (17 %)   | 5 (20 %)  |
| Less than 3 yr                         | 0        | 0          | 0         |
| <b>H&amp;Y stage n (%)</b>             |          |            |           |
| Stage 1                                | 0        | n/a        | 0         |
| Stage 2                                | 3 (23 %) | n/a        | 3 (23%)   |
| Stage 3                                | 6 (46 %) | n/a        | 6 (46%)   |
| Stage 4                                | 4 (31 %) | n/a        | 4 (31%)   |
| <b>Hospitalization type n (%)</b>      |          |            |           |
| Planned hospitalization                | 4 (31 %) | 0          | 4 (16 %)  |
| Unplanned hospitalization              | 9 (69 %) | 12 (100 %) | 21 (84 %) |

**Table 2 Composition of the focus groups**

**Dyads of PwP – CP are marked with \***

| <b>Focus group #</b> | <b>Subject ID</b> | <b>Category of participant</b> | <b>Planned or unplanned hospitalization</b> | <b>Academic or community hospital admission</b> | <b>Gender</b> | <b>Race/ Ethnicity</b> |
|----------------------|-------------------|--------------------------------|---------------------------------------------|-------------------------------------------------|---------------|------------------------|
| 1                    | P_1_G_1_CP*       | Care partner                   | Unplanned                                   | Community                                       | F             | Multi – racial         |
| 1                    | P_2_G_1_PwP*      | Patient                        | Unplanned                                   | Community                                       | M             | White                  |
| 1                    | P_3_G_1_CP*       | Care partner                   | Unplanned                                   | Community                                       | F             | White                  |
| 1                    | P_4_G_1_PwP*      | Patient                        | Unplanned                                   | Community                                       | M             | White                  |
| 1                    | P_5_G_1_PwP       | Patient                        | Planned                                     | Academic                                        | F             | White                  |
| 2                    | P_6_G_2_PwP       | Patient                        | Unplanned                                   | Community                                       | M             | White                  |
| 2                    | P_7_G_2_PwP       | Patient                        | Planned                                     | Academic                                        | M             | White                  |
| 2                    | P_8_G_2_PwP*      | Patient                        | Unplanned                                   | Community                                       | F             | White                  |
| 2                    | P_9_G_2_CP*       | Care partner                   | Unplanned                                   | Community                                       | M             | White                  |
| 3                    | P_10_G_3_CP       | Care partner                   | Unplanned                                   | Academic                                        | F             | White                  |
| 3                    | P_11_G_3_CP       | Care partner                   | Unplanned                                   | Community                                       | F             | White                  |
| 3                    | P_12_G_3_CP       | Care partner                   | Unplanned                                   | Community                                       | M             | Asian                  |
| 3                    | P_13_G_3_CP       | Care partner                   | Unplanned                                   | Community                                       | M             | Asian                  |
| 3                    | P_14_G_3_CP       | Care partner                   | Unplanned                                   | Academic                                        | F             | White                  |

|   |               |              |           |           |   |                  |
|---|---------------|--------------|-----------|-----------|---|------------------|
| 4 | P_15_G_4_PwP  | Patient      | Planned   | Academic  | F | White            |
| 4 | P_16_G_4_PwP  | Patient      | Unplanned | Community | M | Asian            |
| 5 | P_17_G_5_CP   | Care partner | Unplanned | Academic  | F | White            |
| 5 | P_18_G_5_CP   | Care partner | Unplanned | Academic  | F | White            |
| 6 | P_19_G_6_PwP  | Patient      | Unplanned | Academic  | M | Asian            |
| 6 | P_20_G_6_PwP  | Patient      | Unplanned | Community | M | African American |
| 6 | P_21_G_6_CP*  | Care partner | Unplanned | Community | F | African American |
| 6 | P_22_G_6_PwP* | Patient      | Planned   | Academic  | F | White            |
| 7 | P_23_G_7_PwP* | Patient      | Unplanned | Academic  | M | White            |
| 7 | P_24_G_7_CP*  | Care partner | Unplanned | Academic  | F | White            |
| 7 | P_25_G_7_PwP  | Patient      | Unplanned | Community | M | White            |



**Table 3. The impact of PD diagnosis on the hospital experience and perception of care among PwP and CPs during hospitalizations with representative quotes**

PwP gender and diagnosis of hospitalizations presented in parenthesis.

| Theme                                                                                     | PwP and CPs representative quotes                                                                                                                                                                                                                                                                                                                                                                                                                                                                                                                                                                                                                                                                                                                                                                                                                                                                                                                                                                                                                                                                                                                                                                                                                                                                                                                                                                                                                                                                                                                                                                                                                                                                                                                                                                                                                                                                                                                                                                                                                                                                                                                                                                                                                                                              |
|-------------------------------------------------------------------------------------------|------------------------------------------------------------------------------------------------------------------------------------------------------------------------------------------------------------------------------------------------------------------------------------------------------------------------------------------------------------------------------------------------------------------------------------------------------------------------------------------------------------------------------------------------------------------------------------------------------------------------------------------------------------------------------------------------------------------------------------------------------------------------------------------------------------------------------------------------------------------------------------------------------------------------------------------------------------------------------------------------------------------------------------------------------------------------------------------------------------------------------------------------------------------------------------------------------------------------------------------------------------------------------------------------------------------------------------------------------------------------------------------------------------------------------------------------------------------------------------------------------------------------------------------------------------------------------------------------------------------------------------------------------------------------------------------------------------------------------------------------------------------------------------------------------------------------------------------------------------------------------------------------------------------------------------------------------------------------------------------------------------------------------------------------------------------------------------------------------------------------------------------------------------------------------------------------------------------------------------------------------------------------------------------------|
| <p><b>Importance of active acknowledgment of PD diagnosis by the health care team</b></p> | <p>The doctor convinced me that they knew what they're doing with Parkinson's as well. So that was reassuring, even though most of the focus was on the hip. I did not have to tell [about Parkinson's diagnosis] anesthesiologist or any of them. They were all aware. And as a matter of fact, he said to me, "Don't worry about it. We've got that under control and we're taking care of you." So he was great.</p> <p>I wanted to make sure that there was somebody that could do a good job with hip replacement, but they've had patients that had Parkinson's, so they knew that that was an element that was different. (P15G4PwP)</p> <p>The anesthesiologist was really good. He acknowledged Parkinson's disease diagnosis immediately before I went into the surgery. (P20G6PwP)</p> <p>I think there's a big educational deficit with a lot of providers, 'cause in a lot of instances, you tell them that you have Parkinson's, and they get that deer-in-the-headlights look and they don't quite know how it impacts what it is they're looking at. Or, really, what it is. (P25G7PwP)</p> <p>I would end up being the one who bring [Parkinson's diagnosis] up more than anybody [because] the medication [timing] was the issue. It wasn't available in the pharmacy. So then of course now that starts throwing me off on timing wise. I don't think there was awareness of how important timing is of the Parkinson's pills. (P7G2PwP)</p> <p>...they weren't really that familiar with how it impacted this kind of a situation... The nurse didn't ask me, "How often does he have to have the carbidopa?" or "How many pills is he on?" They didn't ask anything about that and I felt that they should have. The people taking care of him really had no experience with Parkinson's, and I felt that they needed serious retraining about Parkinson's. (P1G1CP)</p> <p>I expected them to - whoever was treating him - to understand what Parkinson's meant. It meant tremors, it meant that he had to take L-dopa on time... and I'm not supposed to sleep there next to him the whole time. So, I expected them to say, "Oh, well we understand, and we will make sure that he gets the proper treatment." That's what I thought. I didn't understand that the</p> |

|                                                                                             |                                                                                                                                                                                                                                                                                                                                                                                                                                                                                                                                                                                                                                                                                                                                                                                                                                                                                                                                                                                                                                                                                                                                                                                                                                                                                                                                                                                                                                                                                                    |
|---------------------------------------------------------------------------------------------|----------------------------------------------------------------------------------------------------------------------------------------------------------------------------------------------------------------------------------------------------------------------------------------------------------------------------------------------------------------------------------------------------------------------------------------------------------------------------------------------------------------------------------------------------------------------------------------------------------------------------------------------------------------------------------------------------------------------------------------------------------------------------------------------------------------------------------------------------------------------------------------------------------------------------------------------------------------------------------------------------------------------------------------------------------------------------------------------------------------------------------------------------------------------------------------------------------------------------------------------------------------------------------------------------------------------------------------------------------------------------------------------------------------------------------------------------------------------------------------------------|
|                                                                                             | <p>people taking care of him really had no experience with Parkinson's. I could not trust them. (P24G7CP)</p>                                                                                                                                                                                                                                                                                                                                                                                                                                                                                                                                                                                                                                                                                                                                                                                                                                                                                                                                                                                                                                                                                                                                                                                                                                                                                                                                                                                      |
| <p><b>Different experiences with care during planned and unplanned hospitalizations</b></p> |                                                                                                                                                                                                                                                                                                                                                                                                                                                                                                                                                                                                                                                                                                                                                                                                                                                                                                                                                                                                                                                                                                                                                                                                                                                                                                                                                                                                                                                                                                    |
| <p><b>Planned hospitalization</b></p>                                                       | <p>I think I went and had opinions from three or four doctors, and I wanted to specifically have somebody that can convince me they knew what they had dealt with Parkinson's patients. That was really important to me. [F, hip replacement] (P15G4PwP)</p> <p>That was all very organized... They had all my paperwork ready. I had my physical before the surgery and had a chat with the doctor, what they're gonna do and how long it's gonna take and what I'm gonna need and how long I'll be in the hospital. And so, it went very smoothly actually, and a lot of the paperwork I had done ahead of time. After my spine surgery, they were very encouraging, to get up and move and walk around as much as you can. They don't want you to stay in bed. [F, spine surgery] (P22G6PwP)</p> <p>I was prepared. Number one, I wasn't alone. My daughter went with me. We had my list of medications and when I take them and how much I take. And even though they told me not to bring them, I brought my medications with me just in case I panicked and didn't have them. I was evaluated by physical therapy before discharge, and it was very encouraging to know that I am safe to go home. And to have specific instructions for my knee rehabilitation. [F, knee replacement] (P5G1PwP)</p> <p>For my discharge instructions I left there [hospital] ... and nobody got in touch with my neurologist – I had to make my appointments by myself. [M, cardiac ablation] (P7G2PwP)</p> |
| <p><b>Unplanned hospitalization</b></p>                                                     | <p>I had a hard time breathing and went to ER. I mentioned I had Parkinson's disease when it was time to take my medication. I said that I brought medication, but they insisted that they draw it from their pharmacy rather than use my medication. My medication was delayed and eventually I took my own. [M, pneumonia] (P16G4PwP)</p> <p>In ER, I had to describe exactly what Parkinson's is because they'll look at my hand shaking... They just kind of look... I kind of had to explain to them and then sometimes they would ask more questions about what exactly the disease is. My medications were always late, but I did not bother addressing it. I was never there long enough to make it worthwhile to change. And all the focus was on my urinary tract infection. [F, urinary tract infection] (P8G2PwP)</p>                                                                                                                                                                                                                                                                                                                                                                                                                                                                                                                                                                                                                                                                  |

The whole thing [admission] is so hazy. You don't know whether you are being discharged or not, and you do whatever they tell you to do. You're almost sleepwalking, you know? I could tell that some of the nurses were not as cognizant of what Parkinson's really means and the implications of it. [M, pneumonia] (*P19G6PwP*)

I brought my own walker. The moment I felt better, I started to move around and out of the bed. I did not want to lose ground. And I did not have physical therapy for a while. I think they came only when it was time to discharge me. My wife helped me with walking. [M, urinary tract infection/sepsis] (*P6G2PwP*)

I don't remember physical therapy coming into the hospital at all. And I stayed in bed all the time. It's what they wanted me to do. They were afraid I would fall. [F, urinary tract infection] (*P8G2PwP*)

EMT took him to ER but would not let me ride with them. I said to EMT that he may be having a stroke, but ER nurses did not understand that. It was poor communication between the people who were there and the people who were delivering him. I wish that I had been in the ambulance because I would have known how it was said and how he usually looks. I would've been able to advocate for him immediately and say, "This is an emergency. I think he maybe had a stroke. His speech is impaired." But that didn't happen. I don't know what they thought he was there for. [M, stroke] (*P17G5CP*)

I remember that we were waiting in the ER hallway, and he was extremely agitated. There were six people trying to hold him down and they couldn't. I thought it was due to the fact that his medication wasn't working so I was giving him his medication. And I remember that one of the doctors got so mad at me that he took the glass of water from me so that [PwP] couldn't swallow his medication. But anyway, I gave him the medication and he was less agitated. [M, urinary tract infection] (*P18G5CP*)

We went to ER probably 2:30 - 3:00 pm. Oh and thank goodness I brought some of the pills with me 'cause of course we got into the 5:00 pm and then 9:00 pm carbidopa/levodopa dose before he was in a room. And the people in the ER were not willing to do any of that before he got upstairs. So, I gave him his medications in ER. [M, abdominal infection] (*P3G1CP*)

Every time you go to a hospital, and you come home from the hospital, there's like 30 doctor visits you have to schedule. You gotta go see a neurologist, you gotta see your GP, you gotta go see your cardiologist, your pulmonologist, and then rehab on top of that. And physically moving her [PwP] around can be difficult for her and for us. And so sometimes it was like we couldn't even contemplate her having the ability to do all of that. So, with discharge, it wasn't just sometimes what can we do for her at home, but how are we gonna

|  |                                                                                            |
|--|--------------------------------------------------------------------------------------------|
|  | do all of this when she doesn't even have the strength. [F, pneumonia]<br><i>(P12G3CP)</i> |
|--|--------------------------------------------------------------------------------------------|

**Table 4 The unique needs of PwP and CP during hospitalizations with representative quotes with representative quotes**

| Themes                                                          | PwP and CPs representative quotes                                                                                                                                                                                                                                                                                                                                                                                                                                                                                                                                                                                                                                                                                                                                                                                                                                                                                                                                                                                                                                                                                                     |
|-----------------------------------------------------------------|---------------------------------------------------------------------------------------------------------------------------------------------------------------------------------------------------------------------------------------------------------------------------------------------------------------------------------------------------------------------------------------------------------------------------------------------------------------------------------------------------------------------------------------------------------------------------------------------------------------------------------------------------------------------------------------------------------------------------------------------------------------------------------------------------------------------------------------------------------------------------------------------------------------------------------------------------------------------------------------------------------------------------------------------------------------------------------------------------------------------------------------|
| <b><i>Dissatisfaction with management of PD medications</i></b> |                                                                                                                                                                                                                                                                                                                                                                                                                                                                                                                                                                                                                                                                                                                                                                                                                                                                                                                                                                                                                                                                                                                                       |
| Inconsistent availability of PD medications                     | <p>The medication was the issue. I brought my medication with me, they insisted that I couldn't have my own little stash. I needed to go to the pharmacy. And they took down whatever I was supposed to take. So okay, I take the pills that I've got with me, give them to the nurse who puts them down in the pharmacy and then I have to get them brought back up to me. And all of this is taking time that is pushing me off my normal schedule. (P15G4PwP)</p> <p>They said that the hospital didn't have it [carbidopa]. They said, "Well, we'll have to see if the pharmacy can get it." And so I offered to bring it and they didn't want me to bring it. It was after the third day that they finally got it straightened out, so I don't think he had carbidopa until just before time to leave. (P21G6CP)</p>                                                                                                                                                                                                                                                                                                             |
| Delays in medication schedule                                   | <p>Every four hours, that has to be taken; otherwise, my reaction is awful. Leg starts kicking, the hands start kicking, the body shakes. So, I mean, it's really an awful feeling. (P19G6PwP)</p> <p>I can tell when I need to take my medications. That's when my tremors start when I'm not on time. I take it three times a day. As it wears off, I take it. I asked for it, it took them an hour to get it. (P8G2PwP)</p> <p>But I would also say when someone with Parkinson's is a patient in the hospital, they are probably under stress due to health issues. They probably need their medication early some of the time, not just on time. (P14G3CP)</p> <p>Our biggest problem was the timing. They could not get the idea that the carbidopa/levodopa had to be given at a certain time particularly in relation to meals. (P3G1CP)</p> <p>We know they're hospital and they're not gonna be on the dime at the exact timing, so you have to be somewhat flexible. But with Parkinson's patients, especially with someone who's taking medication every two hours, more than 15 minutes is very impactful. (P12G3CP)</p> |
| Substitution of medications                                     | <p>They were giving me different looking medications that they assured me were the same thing, just a different manufacturer or whatever it was. Every time they gave me something and I looked at it and questioned it. I was only there for two days so it wasn't an extended time period, but it was very disconcerting for me. (P5G1PwP)</p>                                                                                                                                                                                                                                                                                                                                                                                                                                                                                                                                                                                                                                                                                                                                                                                      |

|                                                                                                       |                                                                                                                                                                                                                                                                                                                                                                                                                                                                                                                                                                                                                                                                                                                                                                                                                                                                                                                                                                                                                                                                                                                                                                                                                                                                                                                                                                                                                                                                                                                                            |
|-------------------------------------------------------------------------------------------------------|--------------------------------------------------------------------------------------------------------------------------------------------------------------------------------------------------------------------------------------------------------------------------------------------------------------------------------------------------------------------------------------------------------------------------------------------------------------------------------------------------------------------------------------------------------------------------------------------------------------------------------------------------------------------------------------------------------------------------------------------------------------------------------------------------------------------------------------------------------------------------------------------------------------------------------------------------------------------------------------------------------------------------------------------------------------------------------------------------------------------------------------------------------------------------------------------------------------------------------------------------------------------------------------------------------------------------------------------------------------------------------------------------------------------------------------------------------------------------------------------------------------------------------------------|
| <p>Self-administration of medications</p>                                                             | <p>Now, what happened was that they didn't have something I needed - I wanna say some ropinirole - they did not have it in stock. So that was a problem. And I quite honestly had my son and my husband go home and they sort of snuck it in... (P15G4PwP)</p> <p>I let my wife know to bring the Neupro patches. It would've been a couple days before it got to the pharmacy, so we just went with mine and I thought that was good 'cause they normally don't allow you to do that. (P25G7PwP)</p> <p>And so I tried to tell them that I spoke to my doctor and that this was all cleared and it was fine, but they were a little hesitant and, at one point, said, "Well, why don't you give us the medication and we'll give it to you?" And I said, "No..." I said, "I wanna keep the medication in my nightstand here so I don't get it mixed up with anything else," and so they finally said that was fine. (P22G6PwP)</p> <p>I wish they were away for patients who are self-aware to be able to be more self-dosing while they're in the hospital, with some limit per day. But they often know their needs better than any staff can. (P16G4PwP)</p> <p>...and so a couple times I gave medication to him when he needed to have it and then I just told them that I'd already given it to him. I know they were not happy but we couldn't wait. It was very hard to get through that this is time sensitive. (P3G1CP)</p> <p>I didn't trust them [nurses] to give it to him, so I wanted to give him his pills. (P24G7CP)</p> |
| <p><b><i>Desire for flexibility in hospital protocols regarding falls risk and ambulation</i></b></p> |                                                                                                                                                                                                                                                                                                                                                                                                                                                                                                                                                                                                                                                                                                                                                                                                                                                                                                                                                                                                                                                                                                                                                                                                                                                                                                                                                                                                                                                                                                                                            |
| <p>limitations in mobility protocols and overall ambulation while in the hospital</p>                 | <p>It was kind of funny that as soon as I said Parkinson's they put a tag on my hand saying that the fall risk. So after that, they wouldn't let me get off the bed by myself, even though I was pretty able to walk. As long as I'm on the medication, I'm pretty stable. But they put the tag and after that I had to call the nurse every time I want to get off the bed and use the bathroom or anything like that. (P25G7PwP)</p> <p>They had fits because I would get out of bed and I'd have to urinate and they would just go ballistic about me getting out of bed but they wouldn't come right away 'cause they were dealing with other issues so I took it upon myself to. So finally at about 6 in the morning they brought a port-a-potty into the room. But you know they should have done that sooner if they didn't want me getting out of the bed 'cause alarms went off left and right. (P7G2PwP)</p> <p>"You should continue on moving and get out of the bed" that is not something they [healthcare team] discussed at all. (P19G6PwP)</p>                                                                                                                                                                                                                                                                                                                                                                                                                                                                            |

|                                                                              |                                                                                                                                                                                                                                                                                                                                                                                                                                                                                                                                                                                                                                                                                                                                                                                                                                                                                                                                                                                                                                                                                                                                                                                                                                                                                                                                                                                                                                                                                                                                                                                                                                                                                                                                                                                                                                                                                                                                                                                                                                                                                                                                                                                                                                                                                                                                                                                                                                                                 |
|------------------------------------------------------------------------------|-----------------------------------------------------------------------------------------------------------------------------------------------------------------------------------------------------------------------------------------------------------------------------------------------------------------------------------------------------------------------------------------------------------------------------------------------------------------------------------------------------------------------------------------------------------------------------------------------------------------------------------------------------------------------------------------------------------------------------------------------------------------------------------------------------------------------------------------------------------------------------------------------------------------------------------------------------------------------------------------------------------------------------------------------------------------------------------------------------------------------------------------------------------------------------------------------------------------------------------------------------------------------------------------------------------------------------------------------------------------------------------------------------------------------------------------------------------------------------------------------------------------------------------------------------------------------------------------------------------------------------------------------------------------------------------------------------------------------------------------------------------------------------------------------------------------------------------------------------------------------------------------------------------------------------------------------------------------------------------------------------------------------------------------------------------------------------------------------------------------------------------------------------------------------------------------------------------------------------------------------------------------------------------------------------------------------------------------------------------------------------------------------------------------------------------------------------------------|
|                                                                              | <p>It was difficult to convince them that I'm pretty capable of getting up and walking by myself. They just wouldn't listen to me. And I didn't make a fight because I knew that they had their protocols and that they're following theirs. And like I said, if my fall risk increases, if I realize that I'm getting weak or I stumble more, I would totally welcome that protocol. I know it is useful. (P16G4PwP)</p> <p>To keep someone in bed even two days, my husband has had to relearn to walk twice during the length of his hospitalizations. And it could be prevented if you were able to get out of bed and walk around the room or down the hall every day and it's just not encouraged. They come and do the physical therapy evaluation before discharge. And they should be getting them out of bed every day. It's so quick that you lose the ability to walk. (P14G3CP)</p> <p>And they wouldn't let him out [to be discharged] because they said his balance was so bad. But he had been in bed for three days. So of course, his balance is bad. That's a long time to be in a hospital where he's totally in bed. He couldn't get up and walk. He just had to be in that bed. (P10G3CP)</p> <p>[ for inpatient PT evaluation] he was able to walk across the room and down the corridor. So there wasn't an issue that time. But then when he eventually started doing it at home in a home setting, it was obvious that maybe it was not possible to do. If he would go outdoors, walk down the driveway, and get into the vehicle or drive somewhere and come back, then he couldn't get out of the vehicle. He would just collapse on the ground.(P1G1CP)</p> <p>For Parkinson's, every patient is different and their needs are different. So when I said, "You know, he needs help getting up out of the bed." And he has to have help getting out of a chair even now, and so I had to tell them that because they would come into the room and say, "Okay, it's time to go to the bathroom," and they would take the pole or let him take the pole. He can't do that, you know? His disability doesn't allow for that...(P24G7CP)</p> <p>Even if not walking but at least just some kind of sitting down exercises, and to take him to have some kind of activities. We really don't have that. It hasn't been happening in a hospital on its own, isn't it? It should happen especially with Parkinson's patients.(P21G6CP)</p> |
| <p><b><i>The need for disability – informed hospital environment</i></b></p> |                                                                                                                                                                                                                                                                                                                                                                                                                                                                                                                                                                                                                                                                                                                                                                                                                                                                                                                                                                                                                                                                                                                                                                                                                                                                                                                                                                                                                                                                                                                                                                                                                                                                                                                                                                                                                                                                                                                                                                                                                                                                                                                                                                                                                                                                                                                                                                                                                                                                 |
| <p>Preservation of independence in the hospital environment</p>              | <p>Sometimes it was difficult, especially the dinner, to cut the food up I mean, 'cause my hands start shaking. (P19G6PwP)</p> <p>My husband would always try to order finger food that he would rather feed himself and he always had difficulty with that hand coordination after surgery</p>                                                                                                                                                                                                                                                                                                                                                                                                                                                                                                                                                                                                                                                                                                                                                                                                                                                                                                                                                                                                                                                                                                                                                                                                                                                                                                                                                                                                                                                                                                                                                                                                                                                                                                                                                                                                                                                                                                                                                                                                                                                                                                                                                                 |

|                                                               |                                                                                                                                                                                                                                                                                                                                                                                                                                                                                                                                                                                                                                                                                                                                                                                                                                                                                                                                                                                                                                                                                                                                                                                                                                                        |
|---------------------------------------------------------------|--------------------------------------------------------------------------------------------------------------------------------------------------------------------------------------------------------------------------------------------------------------------------------------------------------------------------------------------------------------------------------------------------------------------------------------------------------------------------------------------------------------------------------------------------------------------------------------------------------------------------------------------------------------------------------------------------------------------------------------------------------------------------------------------------------------------------------------------------------------------------------------------------------------------------------------------------------------------------------------------------------------------------------------------------------------------------------------------------------------------------------------------------------------------------------------------------------------------------------------------------------|
|                                                               | <p>for several days. And so to think about maybe adding items that are finger foods, don't fall apart when you pick them up. <i>(P14G3CP)</i></p> <p>You don't give a Parkinson's person with tremor a full glass of water because it'll be all over the place. You also offer them a straw and always do a half glass of water. Little things like that make all the difference. <i>(P24G7CP)</i></p>                                                                                                                                                                                                                                                                                                                                                                                                                                                                                                                                                                                                                                                                                                                                                                                                                                                 |
| <p>Desire for accommodations for PD – specific care needs</p> | <p>It's hard for me to sleep so when I get to sleep, I'm not really happy when somebody wakes me up and they would come in and have to take my temperature and my blood pressure. <i>(P7G2PwP)</i></p> <p>Every time I've been in the hospital, they keep me fairly close to the nurse's desk and especially during change in shift, you've got all these nurses and everybody congregating at this one spot and they're all talking at once. It gets kind of noisy especially in the middle of the night when they're changing shifts. <i>(P8G2PwP)</i></p> <p>Nurses didn't care that I had Parkinson's and, therefore, disabled in ways that they weren't familiar with. <i>(P23G7PwP)</i></p> <p>It was hard to use urinal. Needless to say, there were times that he would get wet or whatever and I asked [the nurse] if she would help and she said, "No, he needs to learn to just do it himself." And it kind of threw me off 'cause I didn't expect that answer. <i>(P1G1CP)</i></p> <p>The problem is as they get older and sicker, we also get older and sometimes also sicker. It was harder and harder for me to spend those nights in the hospital because those chairs that they give you are very uncomfortable. <i>(P18G5CP)</i></p> |
